# Supplementary material
Source: publisher figshare collection journal article supplement (https://asha.figshare.com/ndownloader/files/30771652)
Supplement: Supplementary file 1 [file 30771652]

**Supplemental Material S1.** Additional augmentative and alternative communication resources.

---

| <b>Device</b>                       | <b>Resource</b>                                                                                                                                                        |
|-------------------------------------|------------------------------------------------------------------------------------------------------------------------------------------------------------------------|
| <i>GoTalk Express 32 User Guide</i> | <i>GoTalk Express 32 User Guide</i> available at <a href="https://www.attainmentcompany.com/gotalk-express-32">https://www.attainmentcompany.com/gotalk-express-32</a> |
| Tobii-Dynavox                       | YouTube Channel: <a href="https://www.youtube.com/tobiidynavox">https://www.youtube.com/tobiidynavox</a>                                                               |
| PRC-Salttillo's                     | YouTube Channel: <a href="https://www.youtube.com/c/PRCBrand/featured">https://www.youtube.com/c/PRCBrand/featured</a>                                                 |

---
